# Supplementary material for: Suppressive effects of bilobalide on depression-like behaviors induced by chronic unpredictable mild stress in mice
Source: Royal Society of Chemistry journal article supplement (doi:10.1039/d3fo02681g), 2023-01-01
Supplement: d3fo02681g1.pdf [file d3fo02681g1.pdf]

**Supplemental data table**

Chronic unpredictability mild stress source

| Days | Stressor1            | Stressor2            | Stressor3            |
|------|----------------------|----------------------|----------------------|
| 15   |                      | Food deprivation     | Noise                |
|      |                      | 48 h                 | 4 h                  |
| 1    | Tail pinch           | Water deprivation    | Noise                |
| 16   | Inverted light cycle | Tail pinch           | Water deprivation    |
|      | 2 min                | 24 h                 | 4 h                  |
|      | 24 h                 | 2 min                | 48 h                 |
| 2    | Food deprivation     | Swimming in the ice  | 45°C high            |
| 17   | Wet bedding          | Cage tilt 45°        | temperature 5 min    |
|      | 48 h                 | water 5 min          | Empty bottle         |
|      | 24 h                 | 24 h                 | placement 24 h       |
| 3    | Swimming in the ice  | Food deprivation     | Inverted light cycle |
| 18   | Tail pinch           | 24 h                 | Inverted light cycle |
|      | water 5 min          | 24 h                 | 24 h                 |
|      | 2 min                | Noise                | 24 h                 |
| 4    | Empty bottle         | Noise                | Cage tilt 45°        |
| 19   | Cage tilt 45°        | 4 h                  | Wet bedding          |
|      | placement 24 h       |                      | 24 h                 |
|      | 24 h                 |                      | 24 h                 |
| 5    | Food deprivation     | Water deprivation    | Wet bedding          |
| 20   | Noise                | Food deprivation     | Swimming in the ice  |
|      | 24 h                 | 24 h                 | 24 h                 |
|      | 4 h                  | 24 h                 | water 5 min          |
| 6    | 45°C high            | 45°C high            | Tail pinch           |
| 21   | temperature 5 min    | Water deprivation    | Water deprivation    |
|      | Tail pinch           | temperature 5 min    | 2 min                |
|      | 24 h                 | 24 h                 | 48 h                 |
| 7    | Food deprivation     | Food deprivation     | Inverted light cycle |
| 22   | 2 min                | Inverted light cycle | Tail pinch           |
|      | 48 h                 | 48 h                 | 24 h                 |
|      | 24 h                 | 24 h                 | 2 min                |
| 8    | Empty bottle         | Wet bedding          | Food deprivation     |
| 23   | Empty bottle         | Noise                | Cage tilt 45°        |
|      | placement 24 h       | 24 h                 | 24 h                 |
|      | placement 24 h       | 4 h                  | 24 h                 |
| 9    | Water deprivation    | Swimming in the ice  | Inverted light cycle |
| 24   | 45°C high            | Swimming in the ice  | Wet bedding          |
|      | temperature 5 min    | water 5 min          | 24 h                 |
|      | 24 h                 | water 5 min          | 24 h                 |
| 10   | Food deprivation     | Cage tilt 45°        | Tail pinch           |
| 25   | 48 h                 | Cage tilt 45°        | Wet bedding          |
|      | Noise                | 24 h                 | 2 min                |
|      | 24 h                 | 24 h                 | 24 h                 |
| 11   | Water deprivation    | Empty bottle         | Water deprivation    |
| 26   | 4 h                  | Food deprivation     | Tail pinch           |
|      | 48 h                 | placement 24 h       | 24 h                 |
|      | 24 h                 | 24 h                 | 2 min                |
| 12   | Inverted light cycle | Food deprivation     | 45°C high            |
| 27   | Swimming in the ice  | Empty bottle         | Water deprivation    |
|      | 24 h                 | 48 h                 | temperature 5 min    |
|      | water 5 min          | placement 24 h       | 24 h                 |
| 13   | Food deprivation     | Water deprivation    | Cage tilt 45°        |
| 28   | 24 h                 | 45°C high            | Food deprivation     |
|      |                      | 48 h                 | 24 h                 |
|      |                      | temperature 5 min    | 24 h                 |
| 14   | Swimming in the ice  | 45°C high            | Wet bedding          |
|      | water 5 min          | temperature 5 min    | 24 h                 |

| Days | Stressor1                          | Stressor2                          | Stressor3                          |
|------|------------------------------------|------------------------------------|------------------------------------|
| 29   | Tail pinch<br>2 min                | Water deprivation<br>48 h          | Inverted light cycle<br>24 h       |
| 30   | Food deprivation<br>48 h           | Noise<br>4 h                       | Swimming in the ice<br>water 5 min |
| 31   | Empty bottle<br>placement 24 h     | Wet bedding<br>24 h                | /                                  |
| 32   | 45°C high<br>temperature 5 min     | Water deprivation<br>24 h          | Cage tilt 45°<br>24 h              |
| 33   | /                                  | Swimming in the ice<br>water 5 min | Food deprivation<br>48 h           |
| 34   | Food deprivation<br>24 h           | Tail pinch<br>2 min                | Empty bottle<br>placement 24 h     |
| 35   | Water deprivation<br>48 h          | Cage tilt 45°<br>24 h              | 45°C high<br>temperature 5 min     |
| 36   | Noise<br>4 h                       | Food deprivation<br>48 h           | /                                  |
| 37   | Wet bedding<br>24 h                | Inverted light<br>cycle 24 h       | Water deprivation<br>24 h          |
| 38   | Swimming in the ice<br>water 5 min | 45°C high<br>temperature 5 min     | Empty bottle<br>placement 24 h     |
| 39   | Water deprivation<br>48 h          | Inverted light cycle<br>24 h       | Wet bedding<br>24 h                |
| 40   | Water deprivation<br>24 h          | Empty bottle<br>placement 24 h     | Food deprivation<br>24 h           |
| 41   | /                                  | 45°C high<br>temperature 5 min     | Inverted light cycle<br>24 h       |
| 42   | Cage tilt 45°<br>24 h              | /                                  | Water deprivation<br>48 h          |

| Days | Stressor1                      | Stressor2                          | Stressor3                          |
|------|--------------------------------|------------------------------------|------------------------------------|
| 43   | Tail pinch<br>2 min            | Noise<br>4 h                       | Food deprivation<br>48 h           |
| 44   | Wet bedding<br>24 h            | Water deprivation<br>24 h          | /                                  |
| 45   | Food deprivation<br>24 h       | Cage tilt 45°<br>24 h              | Swimming in the ice<br>water 5 min |
| 46   | Noise<br>4 h                   | Water deprivation<br>48 h          | Empty bottle<br>placement 24 h     |
| 47   | Water deprivation<br>24 h      | Swimming in the ice<br>water 5 min | Wet bedding<br>24 h                |
| 48   | Food deprivation<br>48 h       | /                                  | Tail pinch<br>2 min                |
| 49   | Inverted light cycle<br>24 h   | Food deprivation<br>24 h           | Water deprivation<br>48 h          |
| 50   | /                              | 45°C high<br>temperature 5 min     | Water deprivation<br>24 h          |
| 51   | Empty bottle<br>placement 24 h | Cage tilt 45°<br>24 h              | Noise<br>4 h                       |
| 52   | Wet bedding<br>24 h            | Food deprivation<br>48 h           | Inverted light cycle<br>24 h       |
| 53   | Tail pinch<br>2 min            | Food deprivation<br>24 h           | 45°C high<br>temperature 5 min     |
| 54   | Noise<br>4 h                   | Water deprivation<br>24 h          | Water deprivation<br>48 h          |
| 55   | Cage tilt 45°<br>24 h          | Swimming in the ice<br>water 5 min | Food deprivation<br>24 h           |
| 56   | /                              | Noise<br>4 h                       | Empty bottle<br>placement 24 h     |
