# Supplementary material for: Suppressive effects of bilobalide on depression-like behaviors induced by chronic unpredictable mild stress in mice
Source: Royal Society of Chemistry journal article supplement (doi:10.1039/d3fo02681g), 2023-01-01
Supplement: d3fo02681g3.pdf [file d3fo02681g3.pdf]

## 1 Supplementary:

2 S. 1: BB structural formula

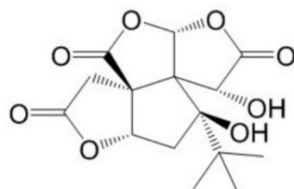

3

4 S. 2: Raw data for the proteins of interest in Figures 3 and 4.

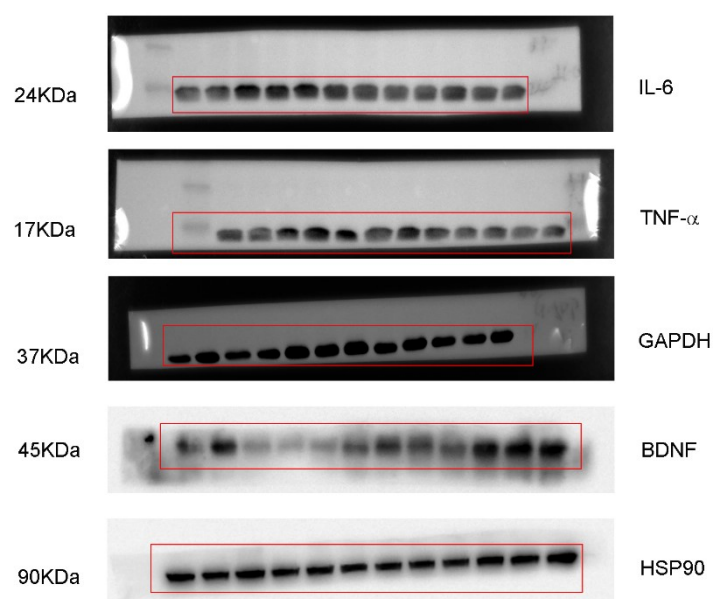

5

6

7 S. 3: Raw data for the proteins of interest in Figures 5.

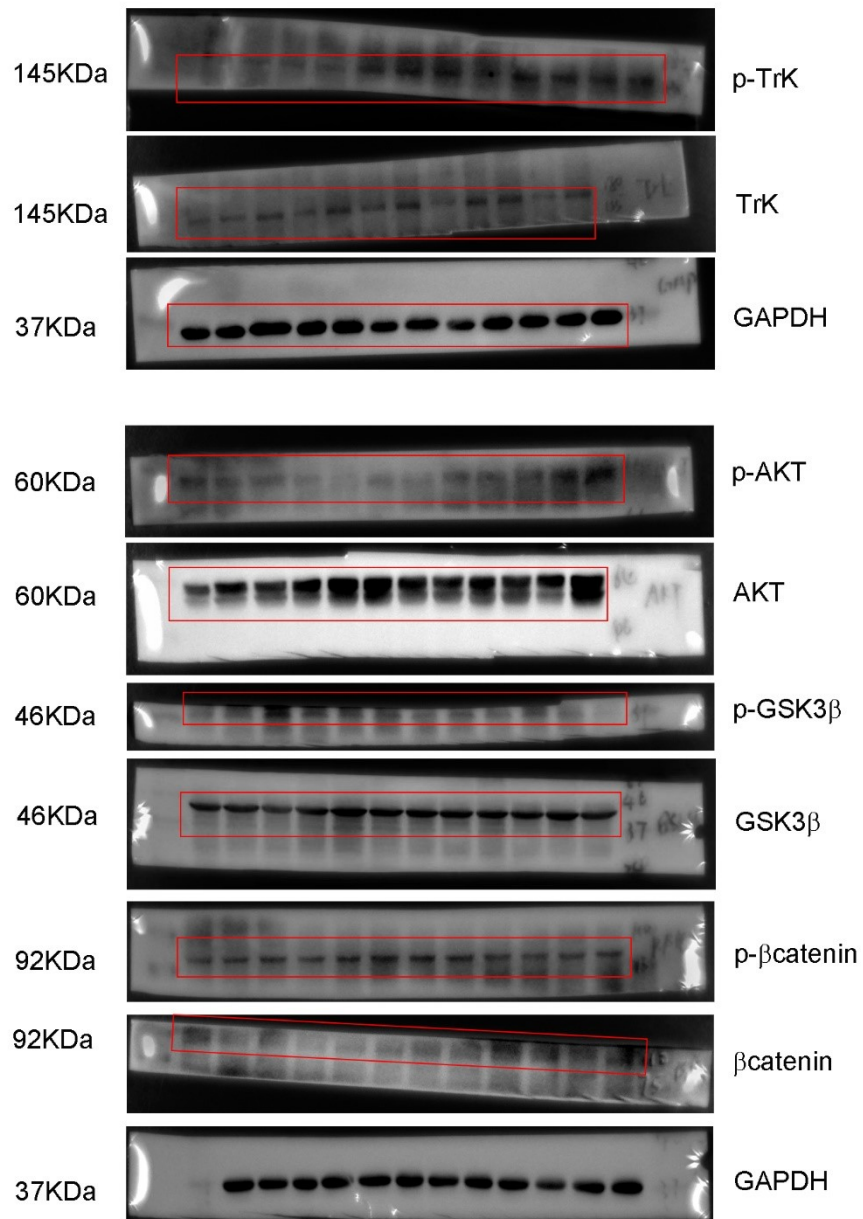

8  
9  
10
